# Supplementary material for: Bifunctional Brønsted–Lewis solid acid as a recyclable catalyst for conversion of glucose to 5-hydroxymethylfurfural and its hydrophobicity effect
Source: Royal Society of Chemistry journal article supplement (doi:10.1039/c6ra03565e), 2016-01-01
Supplement: c6ra03565e1.pdf [file c6ra03565e1.pdf]

## Supporting Information

# Bifunctional Brønsted-Lewis solid acid as recyclable catalyst for conversion of glucose to 5-hydroxymethylfurfural and its hydrophobicity effect

### 1. Cr(III) XRF analysis

CrCl<sub>3</sub>·6H<sub>2</sub>O and KBr were mixed at constant total mass of 0.8 g, but various ratio. After grinding, pellet technique was performed for test. The ratios and experimental results are listed in Table. S1, and the calibration curve is in Fig. S1.

Table. S1. Components ratios of pellet and XRF peak areas of Cr(III)

| No.                           | 1      | 2      | 3      | 4      | 5      |
|-------------------------------|--------|--------|--------|--------|--------|
| Mass of CrCl <sub>3</sub> (g) | 0.0103 | 0.0503 | 0.0998 | 0.2005 | 0.2999 |
| Mass of KBr (g)               | 0.7898 | 0.7500 | 0.7003 | 0.6000 | 0.4996 |
| Cr(III) content (mg/g)        | 2.512  | 12.27  | 24.34  | 48.88  | 73.21  |
| Cr(III) peak area             | 387.5  | 1256   | 2010   | 3623   | 5475   |

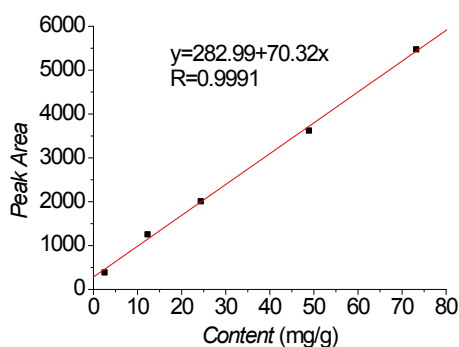

Fig. S1 XRF Calibration curve of Cr(III)

### 2. EDX analysis of Cr(III)-PDVB-0.3-SSFBI

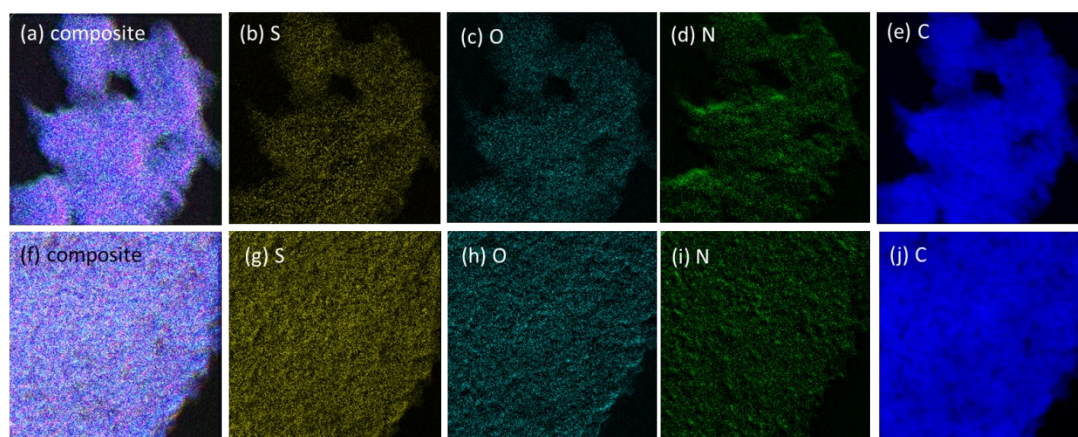

Fig. S 2 Elemental maps of fresh(a-e) and spent (f-j) Cr(III)-PDVB-0.3-SSFBI.

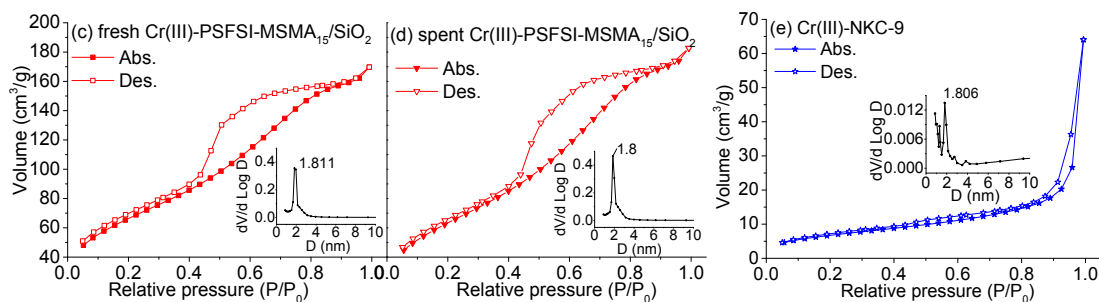

Fig. S3 N<sub>2</sub> adsorption-desorption isotherms and BJH mesopore size distribution from desorption branch (inset). (c) fresh Cr(III)-PSFSI-MSMA<sub>15</sub>/SiO<sub>2</sub>; (d) spent Cr(III)-PSFSI-MSMA<sub>15</sub>/SiO<sub>2</sub>; (e) Cr(III)-NKC-9.

Table. S2 Textural parameters of various solid acid samples

| No. | samples                                                | S <sub>BET</sub> (m <sup>2</sup> /g) | V <sub>total</sub> (cm <sup>3</sup> /g) | Pore size (nm) |
|-----|--------------------------------------------------------|--------------------------------------|-----------------------------------------|----------------|
| 1   | fresh (III)-PSFSI-MSMA <sub>15</sub> /SiO <sub>2</sub> | 239.0                                | 0.248                                   | 1.97           |
| 2   | spent (III)-PSFSI-MSMA <sub>15</sub> /SiO <sub>2</sub> | 234.3                                | 0.266                                   | 1.94           |
| 3   | fresh (III)-PDVB-0.3-SSFBI                             | 302.1                                | 0.265                                   | 1.81           |
| 4   | spent (III)-PDVB-0.3-SSFBI                             | 236.0                                | 0.242                                   | 1.85           |
| 5   | fresh NKC-9                                            | 25.0                                 | 0.032                                   | -              |

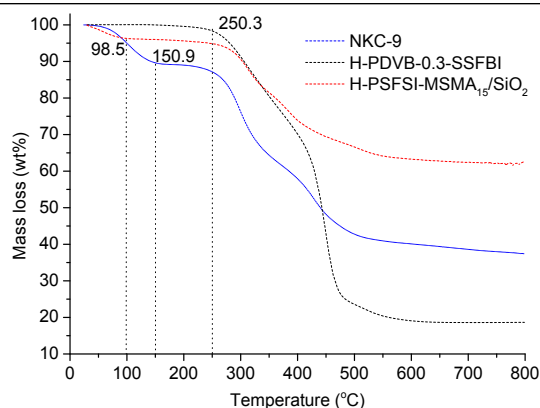

Fig. S4 TG analysis of various solid Brønsted acids

## 2. Experimental results of glucose conversion catalysed by bifunctional solid acids

Table. S3 HMF yield catalyzed by Cr(III)-NKC-9

| Reaction time (h) | Run1 | Run2 | Run3 | average | Standard deviation |
|-------------------|------|------|------|---------|--------------------|
| 1                 | 49.3 | 47.2 | 48.1 | 48.2    | 1.05               |
| 1.5               | 55.5 | 56.8 | 53.1 | 55.1    | 1.88               |
| 2                 | 59.8 | 58.7 | 58.6 | 59.0    | 0.67               |
| 2.5               | 63.8 | 61.2 | 62.9 | 62.6    | 1.32               |
| 3                 | 62.3 | 63.9 | 67.2 | 64.5    | 2.50               |
| 3.5               | 67.9 | 68.2 | 65.8 | 67.3    | 1.31               |
| 4                 | 67.5 | 68.3 | 65.5 | 67.1    | 1.44               |

Table. S4 Glucose conversion catalyzed by Cr(III)-NKC-9

| Reaction time (h) | Run1 | Run2 | Run3 | average | Standard deviation |
|-------------------|------|------|------|---------|--------------------|
| 1                 | 66.9 | 67.1 | 71.5 | 68.5    | 2.60               |

|     |      |      |      |      |      |
|-----|------|------|------|------|------|
| 1.5 | 81.3 | 78.8 | 77.3 | 79.1 | 2.02 |
| 2   | 84.9 | 86.2 | 89.6 | 86.9 | 2.43 |
| 2.5 | 95.8 | 95.2 | 93.4 | 94.8 | 1.25 |
| 3   | 93.4 | 93.1 | 95.7 | 94.1 | 1.42 |
| 3.5 | 92.9 | 94.2 | 97.3 | 94.8 | 2.26 |
| 4   | 100  | 98.2 | 95.8 | 98.0 | 2.11 |

Table. S5 HMF yield catalyzed by Cr(III)-PSFSI-MSMA<sub>15</sub>/SiO<sub>2</sub>

| Reaction time (h) | Run1 | Run2 | Run3 | average | Standard deviation |
|-------------------|------|------|------|---------|--------------------|
| 1                 | 45.3 | 47.2 | 45.8 | 46.1    | 0.98               |
| 2                 | 57.3 | 59.5 | 59.6 | 58.8    | 1.30               |
| 3                 | 60.8 | 61.5 | 63.7 | 62.0    | 1.51               |
| 4                 | 63.4 | 60.1 | 64.0 | 62.5    | 2.10               |
| 5                 | 60.5 | 62.5 | 60.3 | 61.1    | 1.22               |
| 6                 | 63.8 | 63.1 | 60.1 | 62.3    | 1.97               |

Table. S6 Glucose conversion catalyzed by Cr(III)-PSFSI-MSMA<sub>15</sub>/SiO<sub>2</sub>

| Reaction time (h) | Run1 | Run2 | Run3 | average | Standard deviation |
|-------------------|------|------|------|---------|--------------------|
| 1                 | 65.4 | 66.8 | 70.9 | 67.7    | 2.86               |
| 2                 | 88.5 | 86.7 | 83.1 | 86.1    | 2.75               |
| 3                 | 91.2 | 93.5 | 85.3 | 90.0    | 4.23               |
| 4                 | 100  | 100  | 100  | 100.0   | 0.00               |
| 5                 | 100  | 100  | 100  | 100.0   | 0.00               |
| 6                 | 100  | 100  | 100  | 100.0   | 0.00               |

Table. S 7 HMF yield catalyzed by Cr(III)-PDVB-0.3-SSFBI

| Reaction time (h) | Run1 | Run2 | Run3 | average | Standard deviation |
|-------------------|------|------|------|---------|--------------------|
| 3                 | 45.2 | 49.5 | 49.6 | 48.1    | 2.51               |
| 4                 | 49.7 | 48.3 | 51.5 | 49.8    | 1.60               |
| 5                 | 53.6 | 53.1 | 52.1 | 52.9    | 0.76               |
| 6                 | 57.6 | 58.2 | 54.8 | 56.9    | 1.81               |
| 7                 | 59.5 | 60.8 | 57.3 | 59.2    | 1.77               |
| 8                 | 55.3 | 57.2 | 57.9 | 56.8    | 1.35               |
| 9                 | 54.5 | 56.3 | 51.8 | 54.2    | 2.26               |

Table. S 8 Glucose conversion catalyzed by Cr(III)-PDVB-0.3-SSFBI

| Reaction time (h) | Run1 | Run2 | Run3 | average | Standard deviation |
|-------------------|------|------|------|---------|--------------------|
| 3                 | 78.9 | 77.3 | 73.5 | 76.6    | 2.77               |
| 4                 | 79.2 | 79.9 | 81.2 | 80.1    | 1.01               |
| 5                 | 86.1 | 85.3 | 81   | 84.1    | 2.74               |
| 6                 | 89.8 | 91.3 | 95.3 | 92.1    | 2.84               |
| 7                 | 94.7 | 91.2 | 93.9 | 93.3    | 1.83               |
| 8                 | 95.3 | 92.4 | 96.2 | 94.6    | 1.99               |

3. Experimental results of cycle experiments of Cr(III)-PDVB-0.3-SSFBI

Table. S 9 HMF yields of cycle experiments catalyzed by Cr(III)-PDVB-0.3-SSFBI

| Cycle | 1    | 2    | average |
|-------|------|------|---------|
| 1     | 60.5 | 57.8 | 59.2    |
| 2     | 56.6 | 57.9 | 57.3    |
| 3     | 55.9 | 59.8 | 57.9    |
| 4     | 57.3 | 55.8 | 56.6    |
| 5     | 55.2 | 59.9 | 57.6    |
| 6     | 59.3 | 57.1 | 58.2    |
| 7     | 59.5 | 58.1 | 58.8    |
| 8     | 57.3 | 59.9 | 58.6    |
| 9     | 58.5 | 59.8 | 59.2    |
| 10    | 56.9 | 56.3 | 56.6    |
| 11    | 58.7 | 56.5 | 57.6    |
| 12    | 58.3 | 59.8 | 59.1    |
| 13    | 56.5 | 53.7 | 55.1    |

Table. S 10 Glucose conversions of cycle experiments catalyzed by Cr(III)-PDVB-0.3-SSFBI

| Cycle | 1    | 2    | average |
|-------|------|------|---------|
| 1     | 93.7 | 95.3 | 94.5    |
| 2     | 91.8 | 89.1 | 90.5    |
| 3     | 89.1 | 87.3 | 88.2    |
| 4     | 88.6 | 90.6 | 89.6    |
| 5     | 86.1 | 84.7 | 85.4    |
| 6     | 84.7 | 81.9 | 83.3    |
| 7     | 85.9 | 89.1 | 87.5    |
| 8     | 83.6 | 82.2 | 82.9    |
| 9     | 84.1 | 88.9 | 86.5    |
| 10    | 86.7 | 83.1 | 84.9    |
| 11    | 81.9 | 85.1 | 83.5    |
| 12    | 85.2 | 83.9 | 84.6    |
| 13    | 84.7 | 81.9 | 83.3    |

Table. S 11 Cr(III)-PDVB-0.3-SSFBI recovery of cycle experiments

| Cycle | 1    | 2    | average |
|-------|------|------|---------|
| 1     | /    | /    | /       |
| 2     | 94.5 | 92.1 | 93.3    |
| 3     | 93.1 | 96.9 | 95.0    |
| 4     | 93.6 | 91.8 | 92.7    |

|    |      |      |      |
|----|------|------|------|
| 5  | 90.8 | 93.6 | 92.2 |
| 6  | 96.3 | 93.5 | 94.9 |
| 7  | 96.1 | 93.7 | 94.9 |
| 8  | 95.8 | 93.8 | 94.8 |
| 9  | 91.9 | 95.3 | 93.6 |
| 10 | 94.3 | 91.2 | 92.8 |
| 11 | 90.3 | 92.5 | 91.4 |
| 12 | 94.3 | 89.9 | 92.1 |
| 13 | 86.3 | 90.5 | 88.4 |

---
